# Supplementary material for: Magnetic molecules as local sensors of topological hysteresis of superconductors
Source: PubMed Central journal article supplement (PMC9253336; doi:10.1038/s41467-022-31320-5), 2022-07-04
Supplement: 41467_2022_31320_MOESM1_ESM.pdf [file 41467_2022_31320_MOESM1_ESM.pdf]

## Supplementary Information

# Magnetic molecules as local sensors of topological hysteresis of superconductors

Giulia Serrano,<sup>1\*</sup> Lorenzo Poggini,<sup>2</sup> Giuseppe Cucinotta,<sup>3</sup> Andrea Luigi Sorrentino<sup>1,3</sup>, Niccolò Giaconi,<sup>1,3</sup>  
Brunetto Cortigiani,<sup>3</sup> Danilo Longo,<sup>4</sup> Edwige Otero,<sup>4</sup> Philippe Saintavit,<sup>4,5</sup> Andrea Caneschi,<sup>1</sup>  
Matteo Mannini,<sup>3\*</sup> Roberta Sessoli<sup>3</sup>

<sup>1</sup> *Department of Industrial Engineering (DIEF) and INSTM Research Unit, University of Florence,  
Via Santa Marta 3, 50139 Florence, Italy. giulia.serrano@unifi.it*

<sup>2</sup> *Institute for Chemistry of Organo-Metallic Compounds (ICCOM-CNR),  
Via Madonna del Piano 10, 50019 Sesto Fiorentino (FI), Italy.*

<sup>3</sup> *Department of Chemistry "U. Schiff" (DICUS) and INSTM Research Unit, University of Florence,  
Via della Lastruccia 3-13, 50019 Sesto Fiorentino (FI), Italy. matteo.mannini@unifi.it*

<sup>4</sup> *Synchrotron SOLEIL, L'Orme des Merisiers, 91192 Saint-Aubin, France.*

<sup>5</sup> *Institut de Minéralogie, de Physique des Matériaux et de Cosmochimie (IMPMC), CNRS, Sorbonne Université,  
4 place Jussieu, 75252 Paris Cedex 5, France.*

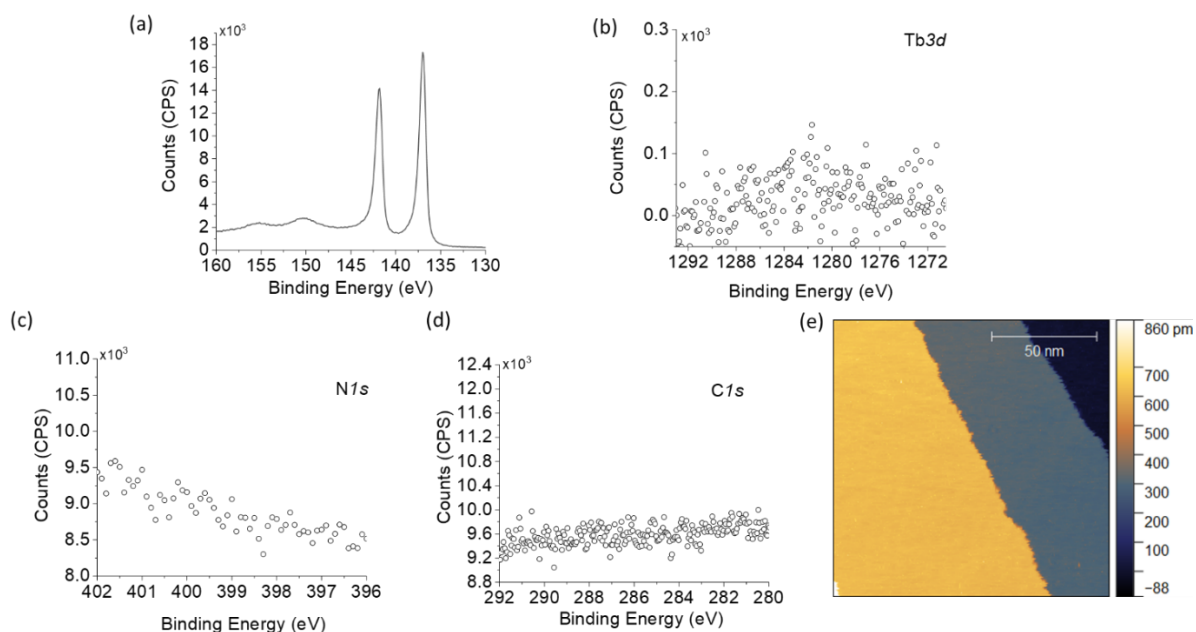

**Figure S1.**  $Pb4f$  (a),  $Tb3d$  (b),  $N1s$  (c) and  $C1s$  (d) core-level XPS spectra recorded on the  $Pb(111)$  single crystal before the  $TbPc_2$  sub-monolayer deposition. (e) STM image of  $Pb$  steps recorded at 35K ( $V_{bias} = 2.0$  V,  $I_{tunnel} = 100$  pA).

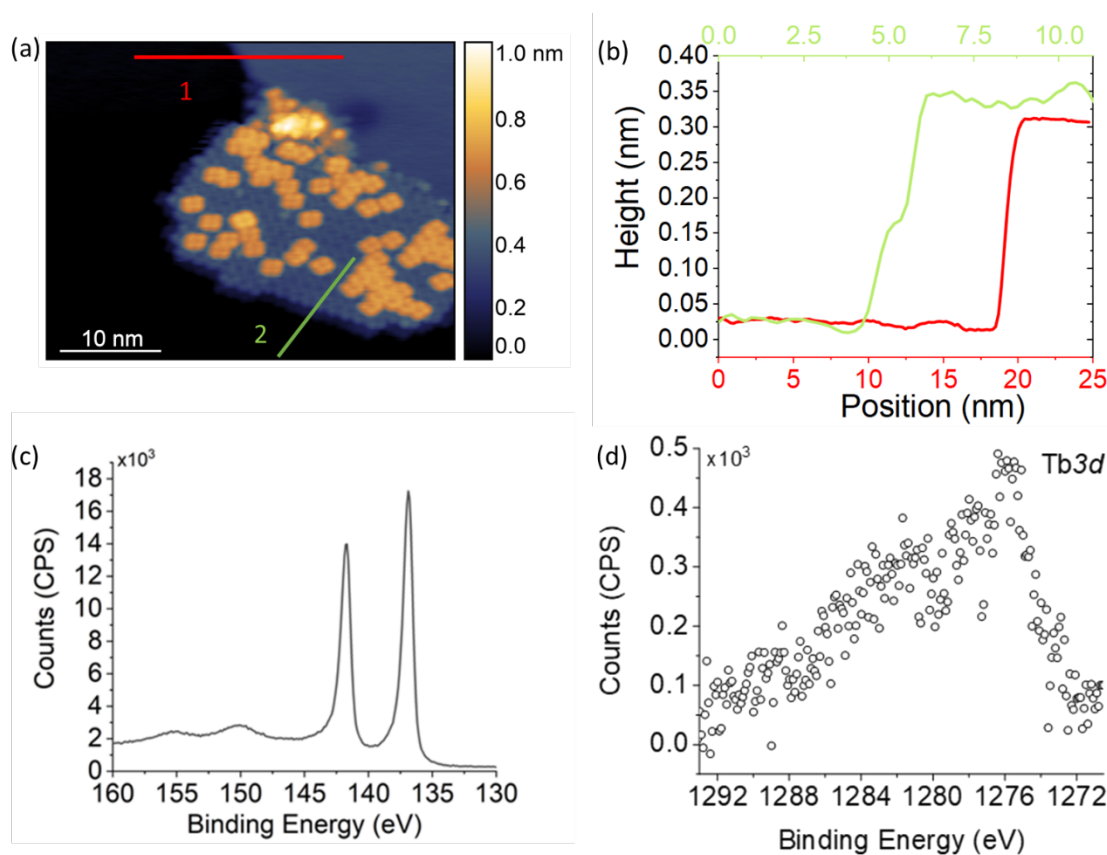

**Figure S2.** (a) STM image ( $I = 5$  pA,  $V = 2$  V) at high magnification with profile (b);  $Pb4f$  (c) and  $Tb3d_{3/2}$  (d) core-level XPS spectra recorded after  $TbPc_2$  sub-monolayer deposition on  $Pb(111)$ .

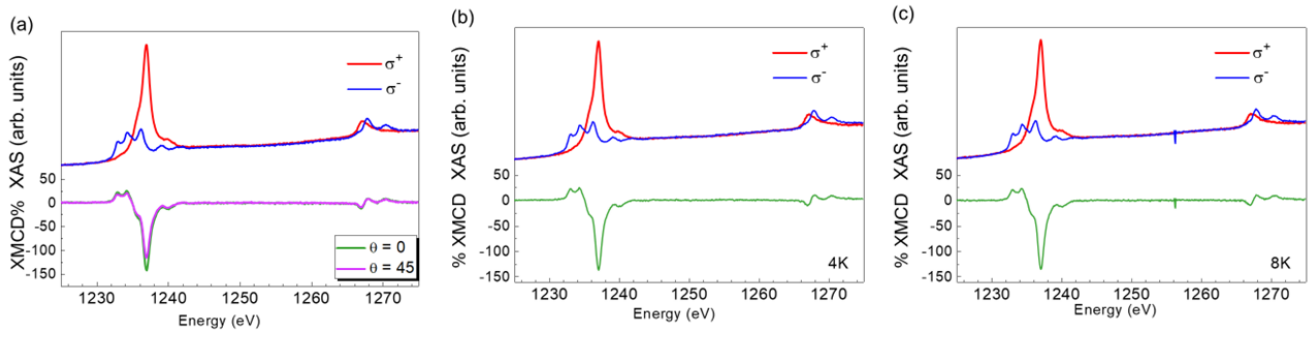

**Figure S3.** (a) Comparison of the XMCD spectra of the TbPc<sub>2</sub> sub-monolayer on Pb(111) at  $\theta = 0^\circ$  and  $\theta = 45^\circ$  (see main text), (b) XMCD spectrum at 4 K and (c) at 8 K. All spectra were recorded at 3T.
